# Supplementary material
Source: publisher figshare collection journal article supplement (https://future-science-group.figshare.com/ndownloader/files/28169460)
Supplement: Supplementary file 1 [file 28169460]

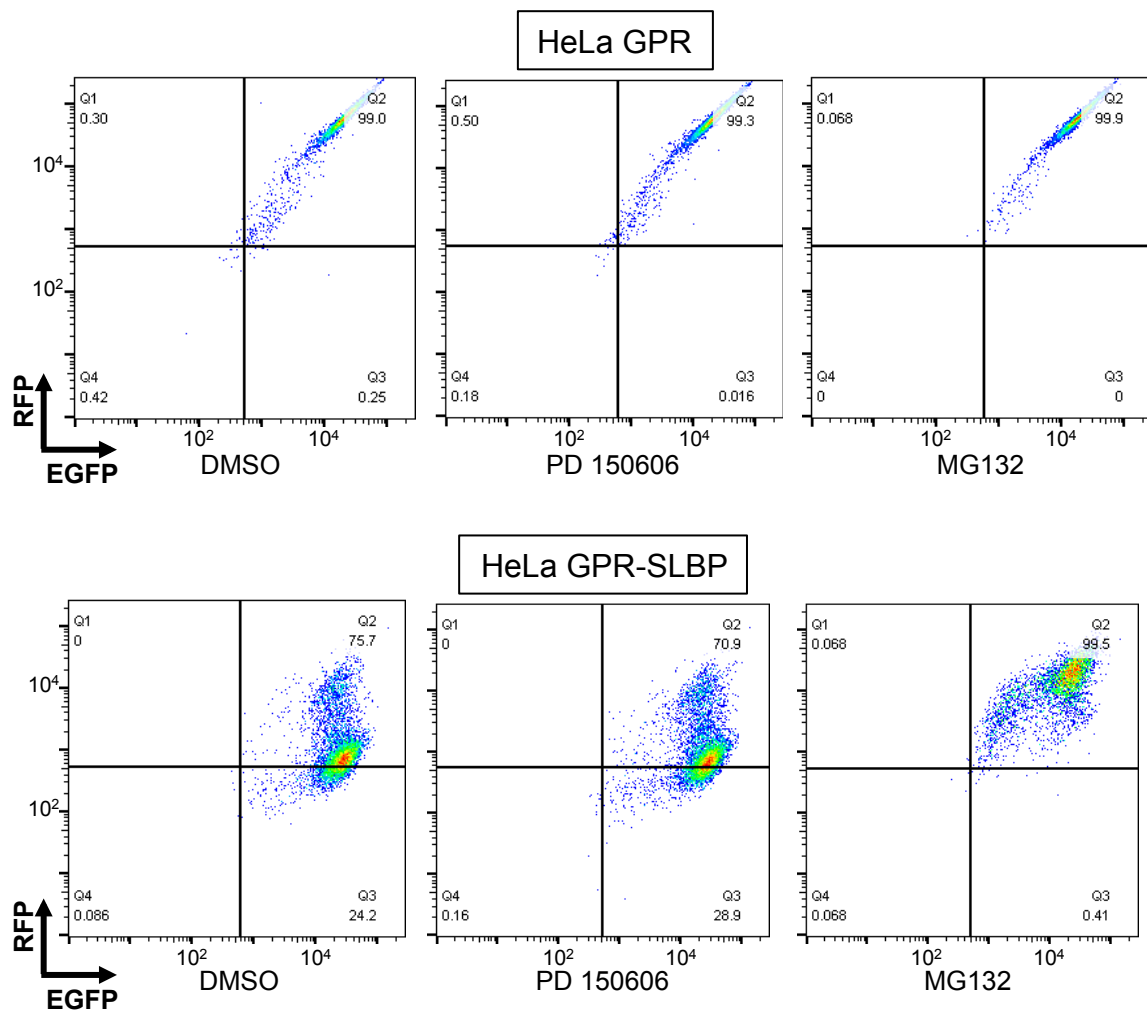

**Supplementary Figure 2:** The plots of RFP versus EGFP fluorescences of the flow cytometry analysis of Figure 3B are represented for GPR and GPR-SLBP cells which were treated by DMSO, PD 150606 or MG132.
